# Supplementary material
Source: publisher figshare collection journal article supplement (https://sage.figshare.com/ndownloader/files/35101185)

Appendix 2: Exemplars of the 40<sup>th</sup> percentile silhouette for male (left) and female (right) adolescents

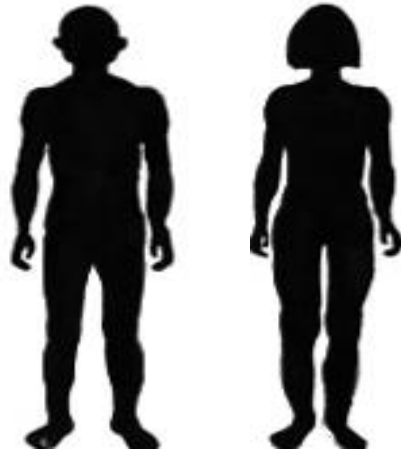

Supplement: Supplementary file 1 [file 35101185]
